# Supplementary material
Source: publisher figshare collection journal article supplement (https://gsajournals.figshare.com/articles/dataset/_/13172801)
Supplement: Supplementary file 1 [file 1]

# Figure S3

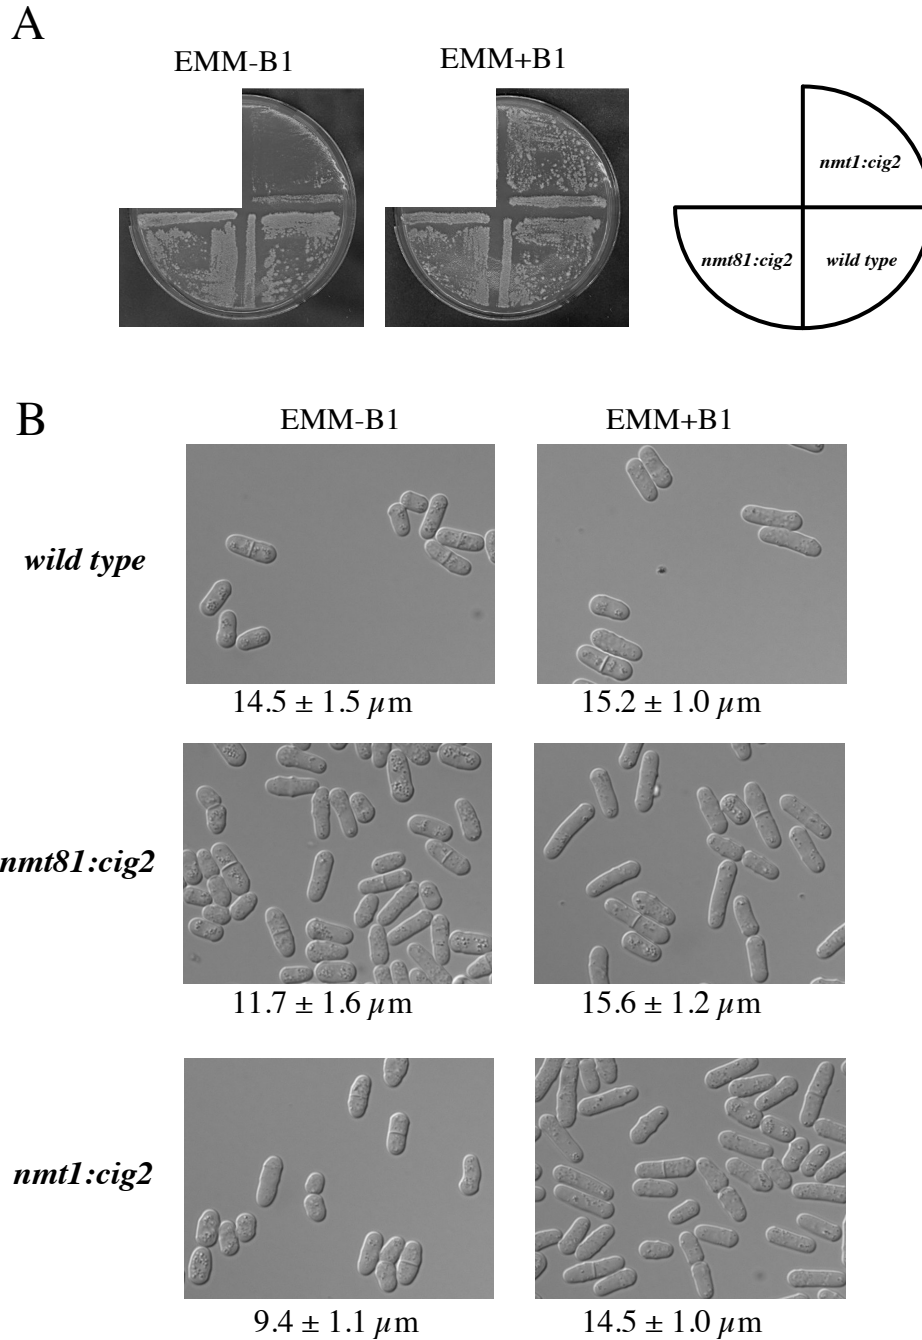

## Supplemental Figure 3: Elevated constitutive expression of Cig2 reduces viability

Cells expressing Cig2 from the endogenous promoter (yFS105), or one of two constitutive promoters, *nmt81* (yFS1047) or *nmt1* (yFS1090) were grown in the presence or absence of thiamine (B1). A) Plate assay of cell viability. B) DIC micrographs of representative cells of a liquid culture. Septation length with standard deviation are shown for  $n > 100$  cells.
