# Supplementary material
Source: publisher figshare collection journal article supplement (https://gsajournals.figshare.com/articles/dataset/_/13172801)
Supplement: Supplementary file 2 [file 1]

# Figure S1

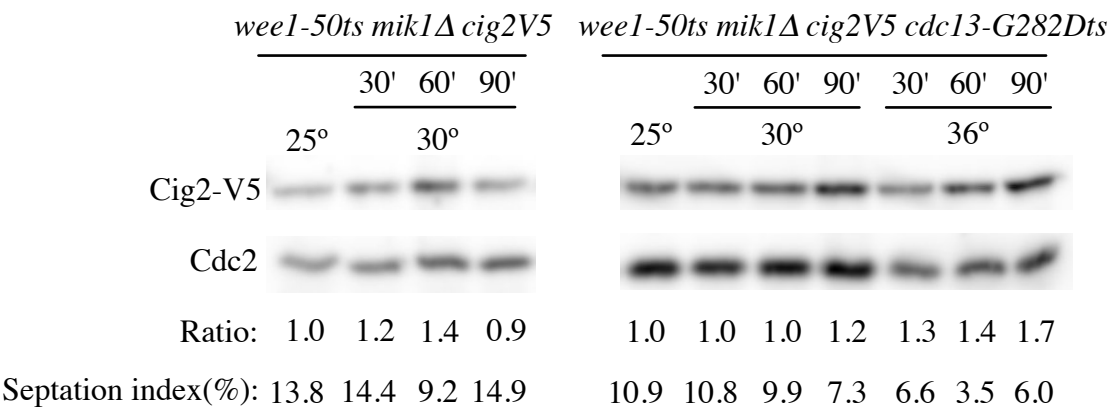

**Supplemental Figure 1: Cig2 protein levels remain consistent despite a reduction in Cdc13 activity**

yFS1087 (*wee1-50ts mik1Δ cig2V5*) and yFS1088 (*wee1-50ts mik1Δ cig2V5 cdc13-G282Dts*) cells were grown in YES to mid-log phase at 25°C and then shifted to either 30°C or 36°C for 30, 60, or 90 minutes. Whole cell extracts were analyzed for V5 expression by Western Blot. Protein levels were normalized to the Cdc2 loading control. The septation index for n > 100 cells is shown.
